# Supplementary material for: Effective electronic-only Kohn–Sham equations for the muonic molecules
Source: Royal Society of Chemistry journal article supplement (doi:10.1039/c8cp00321a), 2018-01-01
Supplement: c8cp00321a1.pdf [file c8cp00321a1.pdf]

# Supporting Information

## Effective electronic-only Kohn-Sham equations for the muonic molecules

Milad Rayka<sup>1</sup>, Mohammad Goli<sup>2,\*</sup> and Shant Shahbazian<sup>1,\*</sup>

*<sup>1</sup> Department of Physics and Department of Physical and Computational  
Chemistry, Shahid Beheshti University, G. C., Evin, Tehran, Iran, 19839, P.O. Box  
19395-4716.*

*<sup>2</sup> School of Nano Science, Institute for Research in Fundamental Sciences (IPM),  
Tehran 19395-5531, Iran*

E-mails:

Mohammad Goli : mgoli2019@gmail.com

Shant Shahbazian: sh\_shahbazian@sbu.ac.ir

\* Corresponding authors

## **Table of contents**

**Pages 3 - 8:** The Cartesian coordinates of the optimized muoniated structures depicted in Figure 2 in the main text.

**Pages 9 - 14:** The Cartesian coordinates of the optimized muoniated ferrocenyl radicals depicted in Figure 3 in the main text.

| Mu-acetylene |                |                        |          |         |
|--------------|----------------|------------------------|----------|---------|
| Atom type    | Nuclear charge | Coordinates (Angstrom) |          |         |
|              |                | X                      | Y        | Z       |
| C            | 6              | 0.04801                | -0.58616 | 0.00000 |
| Mu           | 1              | -0.94683               | -1.20419 | 0.00000 |
| H            | 1              | 0.96878                | -1.16584 | 0.00000 |
| C            | 6              | 0.04801                | 0.71926  | 0.00000 |
| H            | 1              | -0.66429               | 1.53126  | 0.00000 |

| Mu-diazene |                |                        |          |          |
|------------|----------------|------------------------|----------|----------|
| Atom type  | Nuclear charge | Coordinates (Angstrom) |          |          |
|            |                | X                      | Y        | Z        |
| N          | 7              | 0.74076                | -0.15096 | 0.02319  |
| H          | 1              | 1.15164                | 0.78554  | -0.03051 |
| N          | 7              | -0.59555               | 0.02444  | -0.06746 |
| H          | 1              | -1.13599               | -0.80167 | 0.14495  |
| Mu         | 1              | -1.07993               | 0.96698  | 0.17820  |

| Mu-ethylene |                |                        |          |          |
|-------------|----------------|------------------------|----------|----------|
| Atom type   | Nuclear charge | Coordinates (Angstrom) |          |          |
|             |                | X                      | Y        | Z        |
| C           | 6              | -0.69369               | 0.00000  | -0.00200 |
| H           | 1              | -1.10645               | -0.88654 | -0.49274 |
| H           | 1              | -1.10645               | 0.88653  | -0.49274 |
| Mu          | 1              | -1.12735               | 0.00000  | 1.09631  |
| C           | 6              | 0.79390                | 0.00000  | -0.01808 |
| H           | 1              | 1.35196                | 0.92631  | 0.03997  |
| H           | 1              | 1.35196                | -0.92631 | 0.03997  |

| Mu-C-formaldehyde |                |                        |          |          |
|-------------------|----------------|------------------------|----------|----------|
| Atom type         | Nuclear charge | Coordinates (Angstrom) |          |          |
|                   |                | X                      | Y        | Z        |
| O                 | 8              | -0.79134               | 0.00000  | 0.00732  |
| C                 | 6              | 0.57435                | 0.00000  | 0.01424  |
| H                 | 1              | 1.00646                | 0.91035  | 0.45537  |
| H                 | 1              | 1.00646                | -0.91034 | 0.45537  |
| Mu                | 1              | 0.89218                | 0.00000  | -1.13575 |

| Mu-O-formaldehyde |                |                        |          |          |
|-------------------|----------------|------------------------|----------|----------|
| Atom type         | Nuclear charge | Coordinates (Angstrom) |          |          |
|                   |                | X                      | Y        | Z        |
| C                 | 6              | -0.68511               | -0.02779 | 0.05962  |
| H                 | 1              | -1.11960               | -0.99600 | -0.15903 |
| H                 | 1              | -1.23591               | 0.88841  | -0.09062 |
| O                 | 8              | 0.67048                | 0.12557  | -0.02145 |
| Mu                | 1              | 1.15299                | -0.78134 | 0.08705  |

| Mu-C-formamide |                |                        |          |          |
|----------------|----------------|------------------------|----------|----------|
| Atom type      | Nuclear charge | Coordinates (Angstrom) |          |          |
|                |                | X                      | Y        | Z        |
| N              | 7              | 1.19216                | -0.10187 | 0.00000  |
| H              | 1              | 1.35101                | -0.67568 | 0.82140  |
| H              | 1              | 1.35101                | -0.67567 | -0.82141 |
| O              | 8              | -1.21663               | -0.37191 | 0.00000  |
| C              | 6              | -0.13539               | 0.46225  | 0.00000  |
| Mu             | 1              | -0.27518               | 1.18353  | -0.93586 |
| H              | 1              | -0.25088               | 1.13307  | 0.87248  |

| Mu-O-formamide |                |                        |          |          |
|----------------|----------------|------------------------|----------|----------|
| Atom type      | Nuclear charge | Coordinates (Angstrom) |          |          |
|                |                | X                      | Y        | Z        |
| N              | 7              | -1.12306               | -0.25625 | -0.04393 |
| H              | 1              | -1.32328               | -0.69501 | 0.85732  |
| H              | 1              | -1.94472               | 0.22766  | -0.38081 |
| C              | 6              | 0.04227                | 0.52813  | -0.08608 |
| H              | 1              | 0.11354                | 1.51626  | 0.36304  |
| O              | 8              | 1.21051                | -0.17384 | 0.04520  |
| Mu             | 1              | 1.06747                | -1.10120 | -0.40316 |

| Mu-C-HCN  |                |                        |          |         |
|-----------|----------------|------------------------|----------|---------|
| Atom type | Nuclear charge | Coordinates (Angstrom) |          |         |
|           |                | X                      | Y        | Z       |
| C         | 6              | 0.00000                | 0.50241  | 0.00000 |
| H         | 1              | 0.93693                | 1.07817  | 0.00000 |
| Mu        | 1              | -1.00799               | 1.11732  | 0.00000 |
| N         | 7              | 0.00000                | -0.73868 | 0.00000 |

| Mu-N-HCN  |                |                        |          |         |
|-----------|----------------|------------------------|----------|---------|
| Atom type | Nuclear charge | Coordinates (Angstrom) |          |         |
|           |                | X                      | Y        | Z       |
| C         | 6              | -0.00030               | 0.64744  | 0.00000 |
| H         | 1              | 0.89589                | 1.28025  | 0.00000 |
| N         | 7              | -0.00030               | -0.58320 | 0.00000 |
| Mu        | 1              | -0.95653               | -1.12482 | 0.00000 |

| Mu-C-methenamine |                |                        |          |          |
|------------------|----------------|------------------------|----------|----------|
| Atom type        | Nuclear charge | Coordinates (Angstrom) |          |          |
|                  |                | X                      | Y        | Z        |
| N                | 7              | -0.80316               | -0.15310 | 0.00000  |
| H                | 1              | -1.21222               | 0.78947  | 0.00000  |
| C                | 6              | 0.62833                | 0.01211  | 0.00000  |
| H                | 1              | 1.12743                | -0.95854 | 0.00000  |
| H                | 1              | 0.96848                | 0.58405  | -0.87858 |
| Mu               | 1              | 1.00018                | 0.61822  | 0.94259  |

| Mu-N-methenamine |                |                        |          |          |
|------------------|----------------|------------------------|----------|----------|
| Atom type        | Nuclear charge | Coordinates (Angstrom) |          |          |
|                  |                | X                      | Y        | Z        |
| C                | 6              | -0.72897               | 0.00000  | 0.07812  |
| H                | 1              | -1.24362               | -0.93097 | -0.11838 |
| H                | 1              | -1.24363               | 0.93097  | -0.11839 |
| N                | 7              | 0.65504                | 0.00000  | -0.09205 |
| H                | 1              | 1.13790                | 0.83602  | 0.20621  |
| Mu               | 1              | 1.17885                | -0.89694 | 0.20848  |



| exo-Cp-staggered |        |                        |          |          |
|------------------|--------|------------------------|----------|----------|
| Atom             | Charge | Coordinates (Angstrom) |          |          |
|                  |        | X                      | Y        | Z        |
| C                | 6      | 4.58331                | 1.34874  | 0.00087  |
| C                | 6      | 4.28455                | 0.57184  | -1.14566 |
| C                | 6      | 4.28319                | 0.56404  | 1.14185  |
| C                | 6      | 3.86885                | -0.72852 | -0.71811 |
| C                | 6      | 3.86834                | -0.73332 | 0.70525  |
| H                | 1      | 4.90815                | 2.37867  | 0.00460  |
| H                | 1      | 4.37397                | 0.89710  | -2.17191 |
| H                | 1      | 4.37095                | 0.88270  | 2.17031  |
| H                | 1      | 3.62205                | -1.55676 | -1.36540 |
| H                | 1      | 3.62040                | -1.56562 | 1.34689  |
| Fe               | 26     | 2.43015                | 0.64833  | -0.00339 |
| C                | 6      | 1.09284                | 2.00836  | -0.72137 |
| C                | 6      | 1.09351                | 2.01294  | 0.70742  |
| C                | 6      | 0.71950                | 0.70493  | -1.14651 |
| C                | 6      | 0.72062                | 0.71223  | 1.14128  |
| C                | 6      | 0.00000                | 0.00000  | 0.00000  |
| H                | 1      | 1.39915                | 2.82811  | -1.35629 |
| H                | 1      | 1.40042                | 2.83661  | 1.33696  |
| H                | 1      | 0.62301                | 0.41484  | -2.18441 |
| H                | 1      | 0.62498                | 0.42872  | 2.18108  |
| Mu               | 1      | -1.11732               | 0.16641  | -0.00004 |
| H                | 1      | 0.15567                | -1.08243 | 0.00327  |

| endo-Cp-staggered |        |                        |          |          |
|-------------------|--------|------------------------|----------|----------|
| Atom              | Charge | Coordinates (Angstrom) |          |          |
|                   |        | X                      | Y        | Z        |
| C                 | 6      | 4.58959                | 1.34689  | -0.00093 |
| C                 | 6      | 4.28926                | 0.56055  | -1.14067 |
| C                 | 6      | 4.29194                | 0.57174  | 1.14694  |
| C                 | 6      | 3.87466                | -0.73605 | -0.70195 |
| C                 | 6      | 3.87574                | -0.72916 | 0.72149  |
| H                 | 1      | 4.91411                | 2.37691  | -0.00633 |
| H                 | 1      | 4.37660                | 0.87777  | -2.16960 |
| H                 | 1      | 4.38222                | 0.89845  | 2.17265  |
| H                 | 1      | 3.62743                | -1.56946 | -1.34247 |
| H                 | 1      | 3.63051                | -1.55672 | 1.37025  |
| Fe                | 26     | 2.43573                | 0.64653  | 0.00546  |
| C                 | 6      | 1.10122                | 2.01238  | -0.70383 |
| C                 | 6      | 1.09970                | 2.00581  | 0.72470  |
| C                 | 6      | 0.72695                | 0.71206  | -1.13968 |
| C                 | 6      | 0.72446                | 0.70162  | 1.14773  |
| C                 | 6      | 0.00000                | 0.00000  | 0.00000  |
| H                 | 1      | 1.41047                | 2.83640  | -1.33192 |
| H                 | 1      | 1.40765                | 2.82386  | 1.36116  |
| H                 | 1      | 0.63355                | 0.43088  | -2.18035 |
| H                 | 1      | 0.62905                | 0.41062  | 2.18552  |
| H                 | 1      | -1.09212               | 0.17558  | -0.00036 |
| Mu                | 1      | 0.14839                | -1.09955 | -0.00487 |

| exo-Cp-eclipsed |        |                        |          |          |
|-----------------|--------|------------------------|----------|----------|
| Atom            | Charge | Coordinates (Angstrom) |          |          |
|                 |        | X                      | Y        | Z        |
| C               | 6      | 4.54825                | -0.70758 | -0.50978 |
| C               | 6      | 4.54736                | 0.70860  | -0.50968 |
| C               | 6      | 3.99679                | -1.14808 | 0.73334  |
| C               | 6      | 3.99536                | 1.14831  | 0.73347  |
| C               | 6      | 3.68567                | -0.00011 | 1.50973  |
| H               | 1      | 4.89490                | -1.34612 | -1.30860 |
| H               | 1      | 4.89328                | 1.34772  | -1.30835 |
| H               | 1      | 3.86371                | -2.17556 | 1.03752  |
| H               | 1      | 3.86113                | 2.17549  | 1.03806  |
| H               | 1      | 3.25212                | -0.00020 | 2.49933  |
| Fe              | 26     | 2.48866                | -0.00043 | -0.28915 |
| C               | 6      | 1.37178                | -0.71599 | -1.83149 |
| C               | 6      | 1.37217                | 0.71435  | -1.83182 |
| C               | 6      | 0.80926                | -1.14610 | -0.60075 |
| C               | 6      | 0.81001                | 1.14541  | -0.60117 |
| C               | 6      | 0.00000                | 0.00000  | 0.00000  |
| H               | 1      | 1.79325                | -1.34773 | -2.60084 |
| H               | 1      | 1.79403                | 1.34533  | -2.60157 |
| H               | 1      | 0.66954                | -2.18453 | -0.33126 |
| H               | 1      | 0.67083                | 2.18412  | -0.33246 |
| Mu              | 1      | -1.08406               | 0.00044  | -0.31808 |
| H               | 1      | 0.00219                | -0.00020 | 1.09405  |

| endo-Cp-eclipsed |        |                        |          |          |
|------------------|--------|------------------------|----------|----------|
| Atom             | Charge | Coordinates (Angstrom) |          |          |
|                  |        | X                      | Y        | Z        |
| C                | 6      | 4.55382                | -0.70764 | -0.50563 |
| C                | 6      | 4.55468                | 0.70865  | -0.50594 |
| C                | 6      | 4.00353                | -1.14713 | 0.73820  |
| C                | 6      | 4.00478                | 1.14926  | 0.73777  |
| C                | 6      | 3.69465                | 0.00128  | 1.51457  |
| H                | 1      | 4.89870                | -1.34701 | -1.30454 |
| H                | 1      | 4.90035                | 1.34704  | -1.30529 |
| H                | 1      | 3.86964                | -2.17414 | 1.04350  |
| H                | 1      | 3.87219                | 2.17686  | 1.04183  |
| H                | 1      | 3.26296                | 0.00067  | 2.50501  |
| Fe               | 26     | 2.49499                | 0.00159  | -0.28506 |
| C                | 6      | 1.38124                | -0.71424 | -1.82773 |
| C                | 6      | 1.38021                | 0.71588  | -1.82791 |
| C                | 6      | 0.81626                | -1.14493 | -0.59762 |
| C                | 6      | 0.81450                | 1.14602  | -0.59798 |
| C                | 6      | 0.00000                | 0.00000  | 0.00000  |
| H                | 1      | 1.80631                | -1.34529 | -2.59572 |
| H                | 1      | 1.80399                | 1.34777  | -2.59596 |
| H                | 1      | 0.67950                | -2.18398 | -0.32889 |
| H                | 1      | 0.67555                | 2.18486  | -0.32948 |
| H                | 1      | -1.05768               | -0.00098 | -0.32393 |
| Mu               | 1      | -0.00786               | 0.00067  | 1.11038  |

| Fe-eclipsed |        |                       |          |          |
|-------------|--------|-----------------------|----------|----------|
| ATOM        | ATOMIC | Coordintes (Angstrom) |          |          |
|             |        | X                     | Y        | Z        |
| C           | 6      | 0.70005               | 1.65236  | 1.34099  |
| C           | 6      | -0.70591              | 1.65216  | 1.33737  |
| C           | 6      | 0.70579               | -1.65227 | 1.33742  |
| C           | 6      | -0.70015              | -1.65240 | 1.34104  |
| C           | 6      | 1.15075               | 1.83060  | -0.00339 |
| C           | 6      | -1.14985              | 1.83073  | -0.00920 |
| C           | 6      | 1.14971               | -1.83085 | -0.00917 |
| C           | 6      | -1.15088              | -1.83046 | -0.00334 |
| C           | 6      | 0.00259               | 2.01276  | -0.82814 |
| C           | 6      | -0.00275              | -2.01271 | -0.82811 |
| H           | 1      | 1.33558               | 1.49178  | 2.19883  |
| H           | 1      | -1.34558              | 1.49151  | 2.19213  |
| H           | 1      | 1.34546               | -1.49170 | 2.19219  |
| H           | 1      | -1.33566              | -1.49169 | 2.19887  |
| H           | 1      | -2.17620              | 1.89495  | -0.33733 |
| H           | 1      | 2.17867               | 1.89477  | -0.32663 |
| H           | 1      | -2.17880              | -1.89438 | -0.32660 |
| H           | 1      | 2.17607               | -1.89527 | -0.33728 |
| H           | 1      | 0.00522               | 2.25816  | -1.87873 |
| H           | 1      | -0.00537              | -2.25805 | -1.87871 |
| Fe          | 26     | 0.00000               | 0.00000  | 0.00000  |
| Mu          | 1      | 0.00002               | 0.00002  | -1.52429 |

| Fe-staggered |        |                        |          |          |
|--------------|--------|------------------------|----------|----------|
| Atom         | Charge | Coordinates (Angstrom) |          |          |
|              |        | X                      | Y        | Z        |
| C            | 6      | -1.64609               | 0.71573  | -1.18184 |
| C            | 6      | -0.45784               | 1.14392  | -1.83465 |
| C            | 6      | 0.24921                | 0.00078  | -2.28317 |
| C            | 6      | -0.45613               | -1.14352 | -1.83543 |
| C            | 6      | -1.64489               | -0.71775 | -1.18208 |
| H            | 1      | -2.42255               | 1.35442  | -0.79080 |
| H            | 1      | -0.15841               | 2.17187  | -1.97759 |
| H            | 1      | 1.20444                | 0.00104  | -2.78565 |
| H            | 1      | -0.15491               | -2.17089 | -1.97872 |
| H            | 1      | -2.42050               | -1.35782 | -0.79166 |
| Fe           | 26     | 0.00000                | 0.00000  | 0.00000  |
| C            | 6      | 0.65487                | 0.00016  | 2.07423  |
| C            | 6      | 1.17236                | 1.15047  | 1.41057  |
| C            | 6      | 2.09538                | 0.70096  | 0.41616  |
| C            | 6      | 2.09430                | -0.70344 | 0.41629  |
| C            | 6      | 1.17068                | -1.15121 | 1.41094  |
| H            | 1      | 0.00497                | 0.00104  | 2.93531  |
| H            | 1      | 0.96449                | 2.17784  | 1.66811  |
| H            | 1      | 2.64835                | 1.33730  | -0.25853 |
| H            | 1      | 2.64628                | -1.34093 | -0.25811 |
| H            | 1      | 0.96103                | -2.17815 | 1.66877  |
| Mu           | 1      | -1.15470               | 0.00104  | 0.98778  |
